# Supplementary material
Source: PubMed Central journal article supplement (PMC5087013)
Supplement: pnas.1613372113.sapp.pdf [file pnas.1613372113.sapp.pdf]

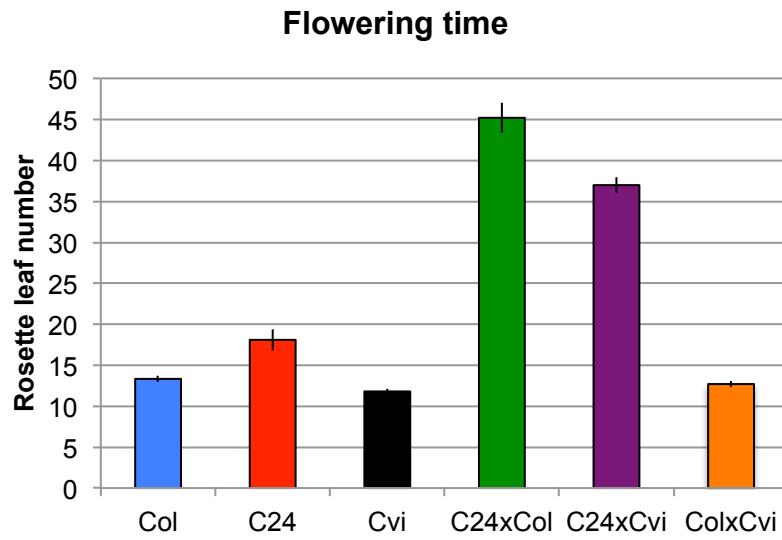

**Figure S1.** Flowering time in three F<sub>1</sub> hybrids and their parental lines as measured by leaf number at bolting. Data represent mean values ± standard error obtained from more than twenty plants.

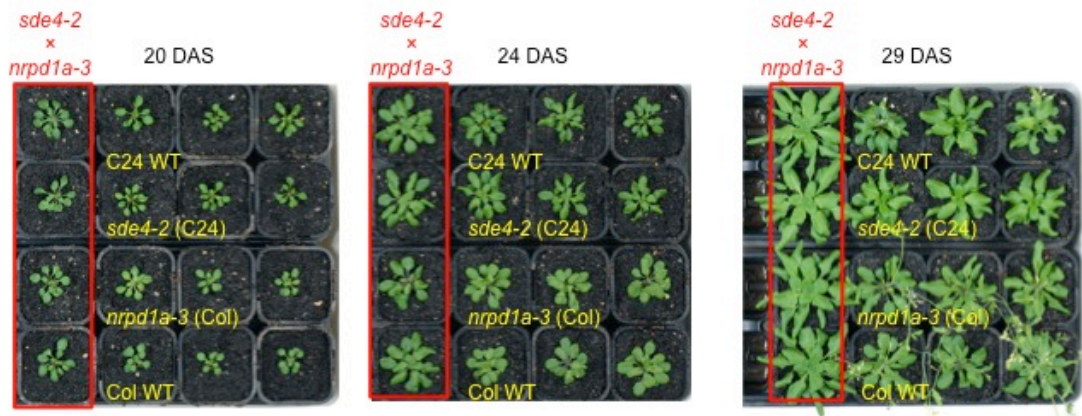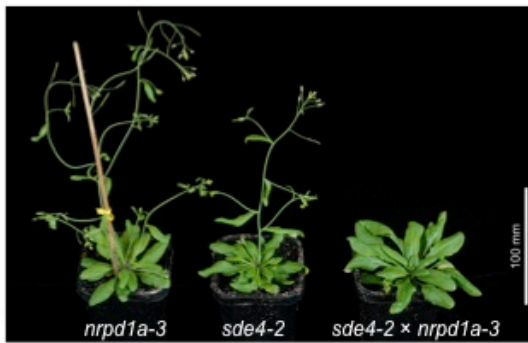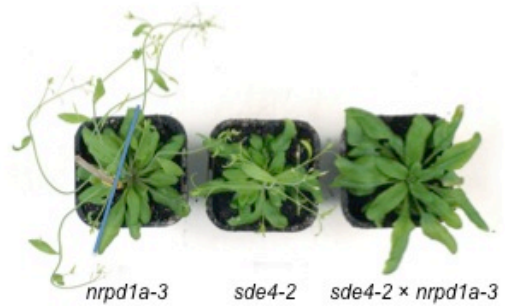

**Figure S2.** Phenotype of the *pol IV* mutant hybrid. Seedlings at 20 DAS (Upper Left), 24 DAS (Upper middle), and 29 DAS plants (Upper Right). *Pol IV* mutant hybrid showed late flowering time and greater biomass than its parents (Bottom).

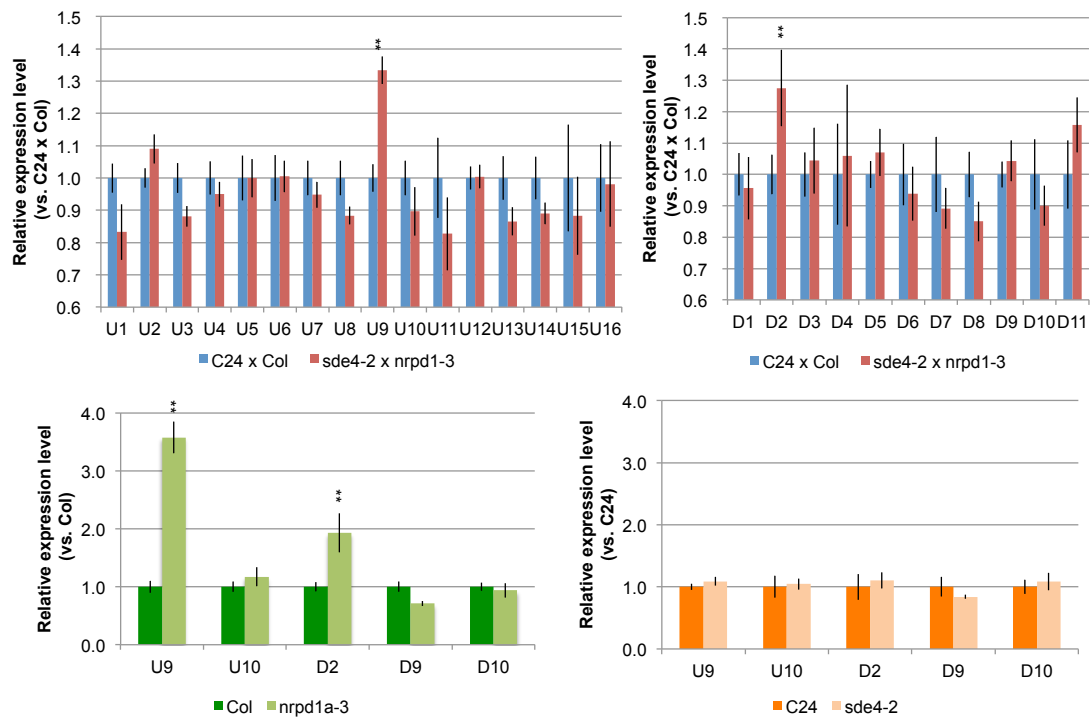

**Figure S3.** Expression analysis of non-additively expressed genes between C24 x Col hybrids and parental lines in *pol IV* mutant hybrids. Expression levels of up- (U1-U16, Upper left) and down-regulated (D1-D11, Upper right) genes in C24 x Col hybrids were compared between C24 x Col and *pol IV* mutant hybrids. Expression levels of U9, U10, D2, D9, and D10 genes were compared between Col-0 and *nrpd1a-3* (Bottom left) or between C24 and *sde4-2* (Bottom right). Data represent mean values  $\pm$  standard error obtained from three biological and technical replications. \*\*,  $p < 0.01$

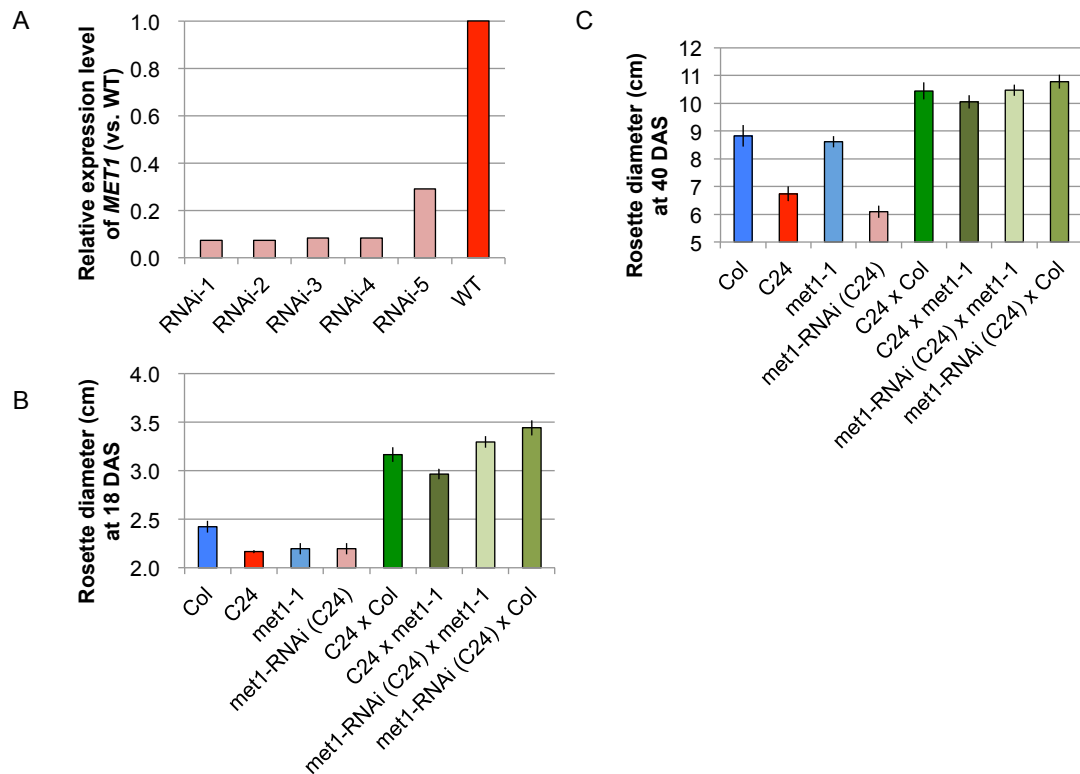

**Figure S4.** Rosette diameter in the hybrids between *met1*-RNAi plants and *met1-1*. (A) *MET1* expression levels in leaves of T<sub>1</sub> plants analyzed by RT-qPCR. Relative expression levels of *met1*-RNAi plants were calculated with a control of wild type plants C24 being given a value of 1.0. The *actin* gene was used as a standard of expression level. The rosette diameter at 18 DAS (B) and 40 DAS (C). Data represent mean values  $\pm$  standard error obtained from more than twenty plants.

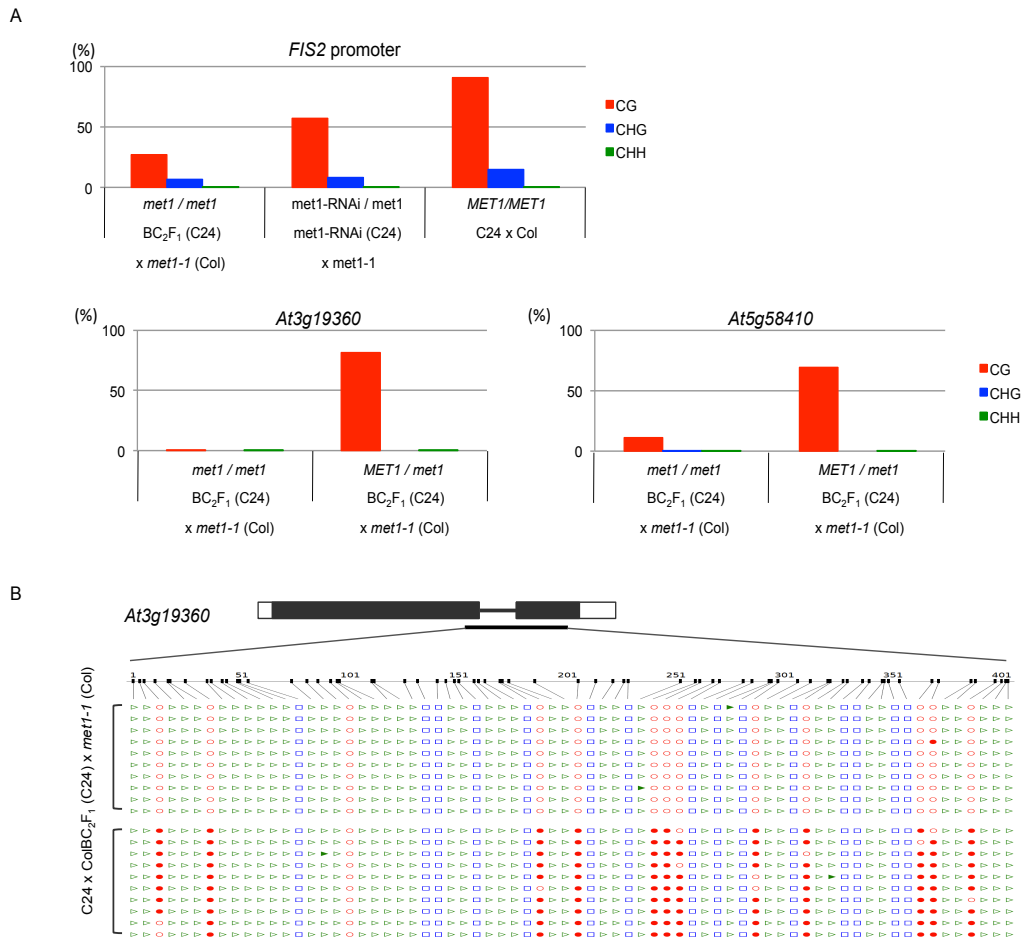

**Figure S5.** Validation of decrease in DNA methylation in *met1*-RNAi (C24) x *met1-1* or BC<sub>2</sub>F<sub>1</sub> (C24) x *met1-1* hybrid by bisulfite-sequencing. (A) The percentage of DNA methylation in *FIS2* (Upper), *At3g19360* (Bottom left), and *At5g58410* (Bottom right) is shown in the bar graph. Ten clones from bisulfite-treated templates were sequenced. (B) DNA methylation pattern visualized by CyMATE (<http://www.cymate.org/>) in exon regions of *At3g19360*. Closed circles, triangles and squares represent methylated cytosine for CG, CHG, and CHH context, respectively. Open circles, triangles and squares represent non-methylated cytosine for CG, CHG, and CHH context, respectively.

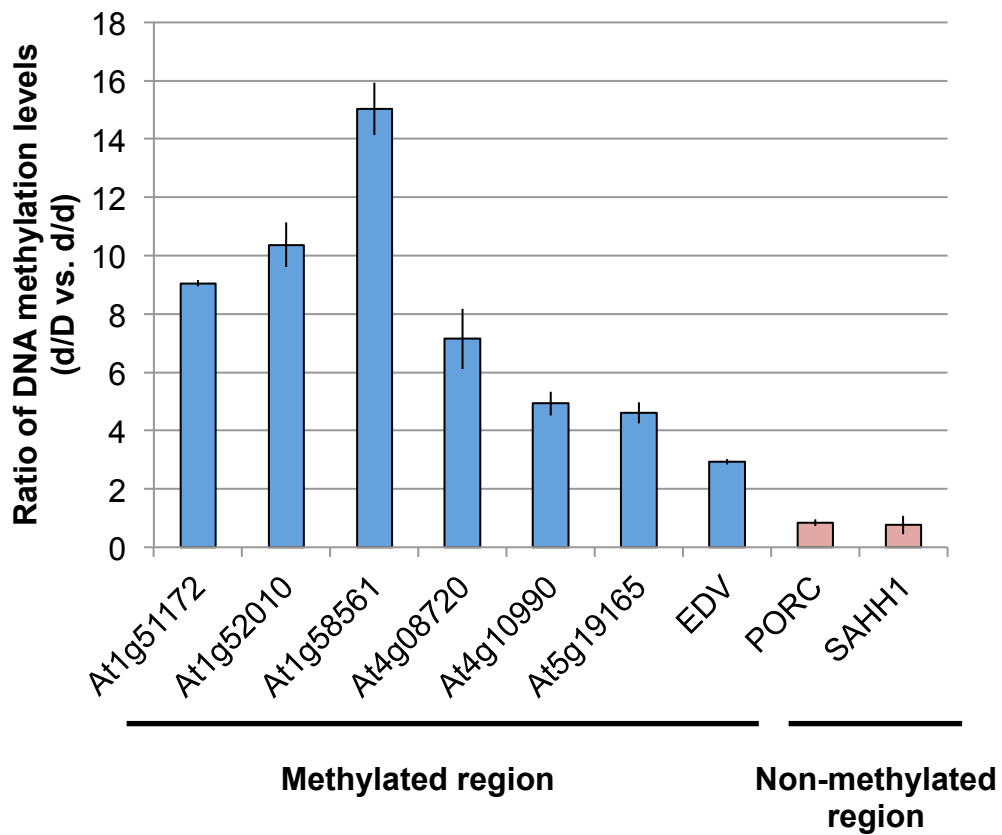

**Figure S6.** Ratio of DNA methylation levels in the heterozygous *ddm1* hybrids compared with the homozygous *ddm1* hybrids. At1g51172, At1g52010, At1g58561, At4g08720, At4g10990, At5g19165 and *EDV* are methylated in Col, and *PORC* and *SAHH1* have no DNA methylation.

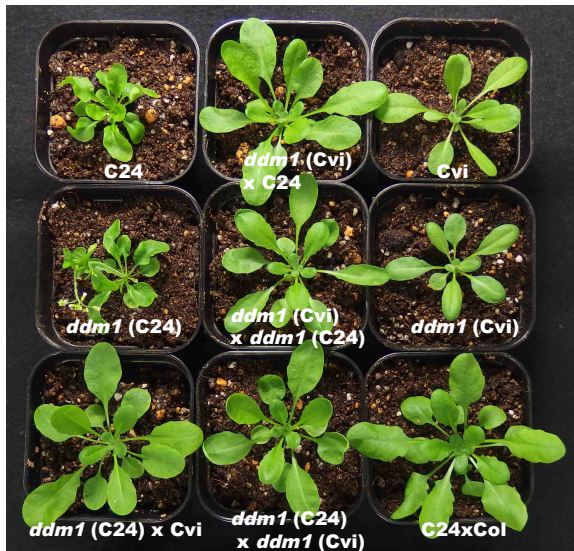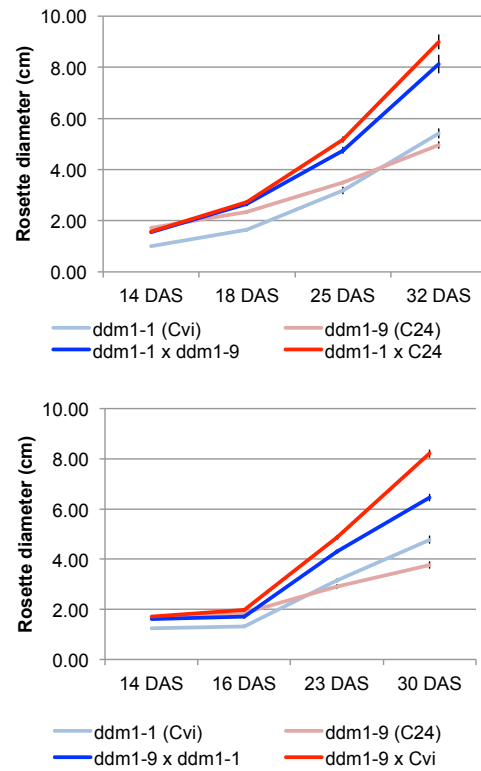

**Figure S7.** Phenotype of the *ddm1* mutant hybrid between C24 and Cvi background lines. Time course of rosette diameter is shown in right panel. Data represent mean values  $\pm$  standard error obtained from more than twenty plants.

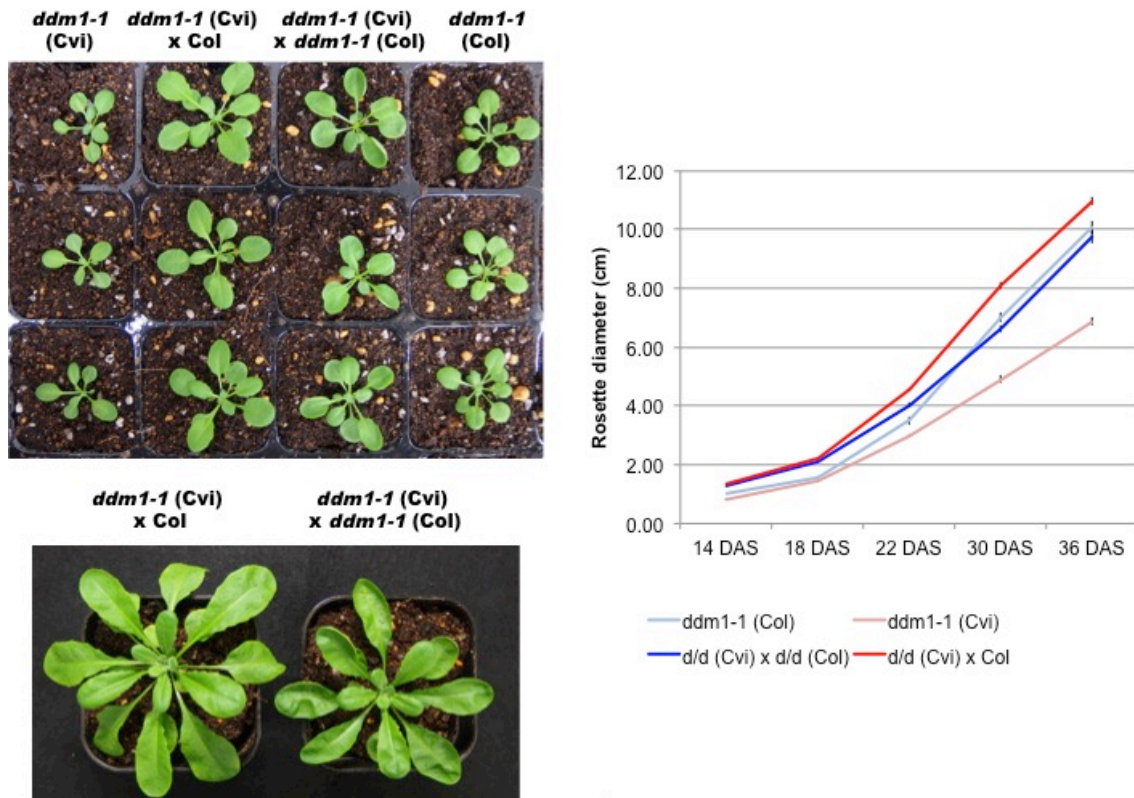

**Figure S8.** Phenotype of the *ddm1* mutant hybrid between Cvi and Col background lines at 21 DAS (Upper left) and 36 DAS (Bottom left). Time course of rosette diameter is shown in right panel. Data represent mean values  $\pm$  standard error obtained from more than twenty plants.



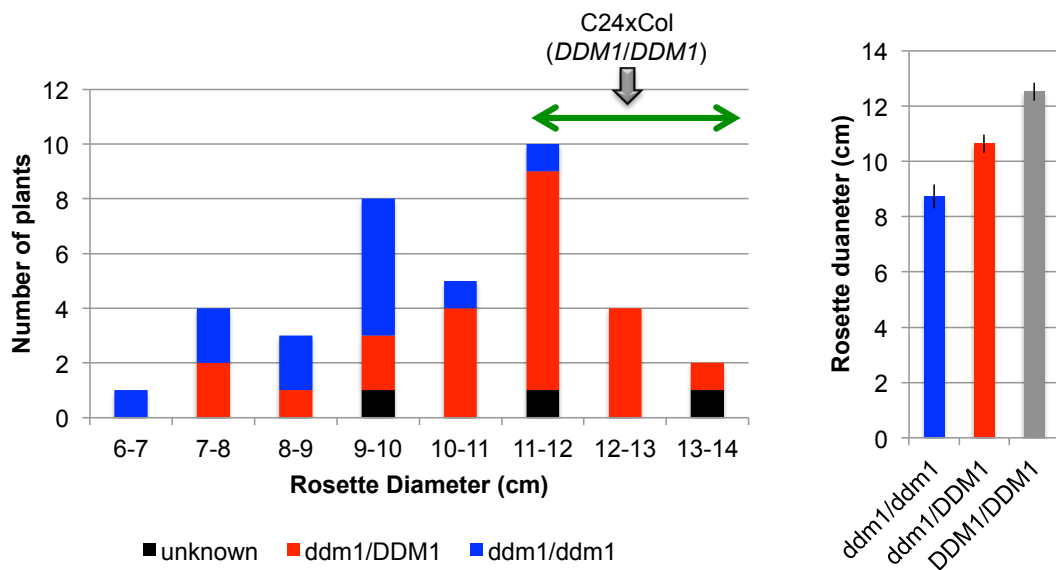

**Figure S9.** Rosette diameter (RD) in the hybrid between C24 (*ddm1/ddm1*) x Col (*DDM1/ddm1*) at 28 DAS. Frequency distribution of the RD for C24 (*ddm1/ddm1*) x Col (*DDM1/ddm1*) hybrids (Left panel). Rosette diameter of heterozygous and homozygous *ddm1* hybrids and C24 x Col wild type hybrid (*DDM1/DDM1*) at 28 DAS (Right panel). Unknown represents plants genotypes has not been determined.

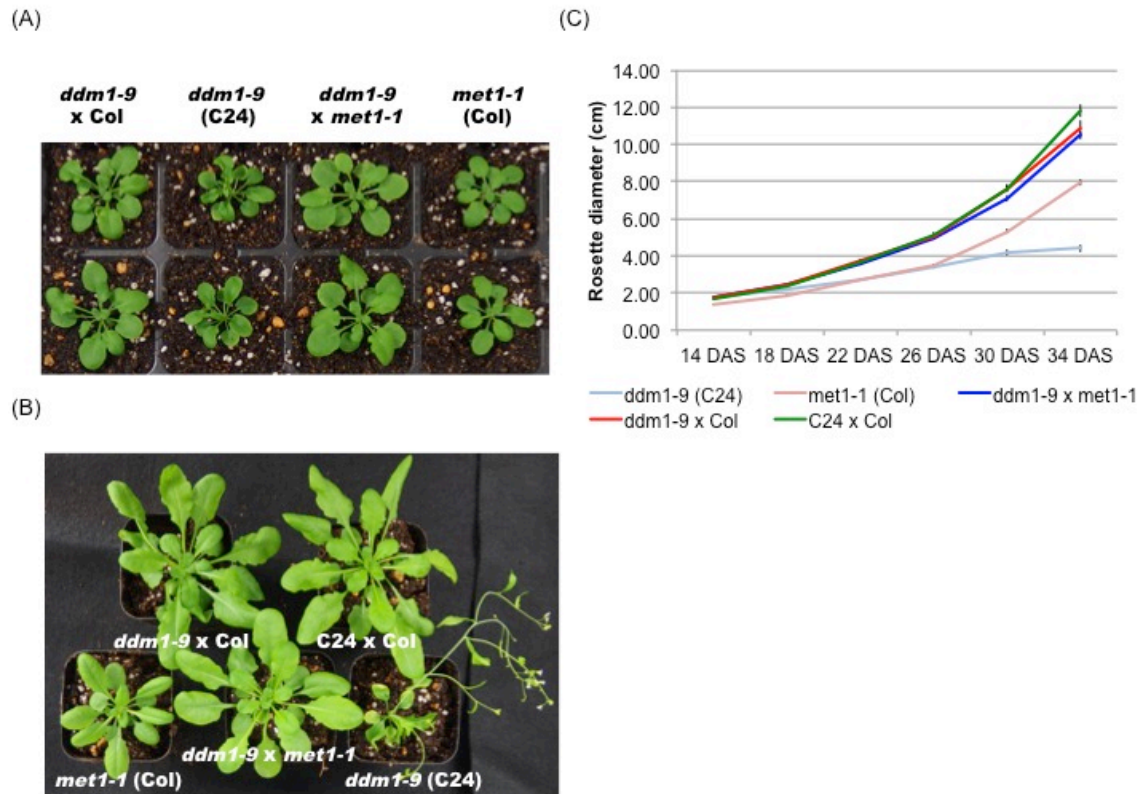

**Figure S10.** Phenotype of the hybrids between *ddm1-9* (C24) and *met1-1* (Col) mutant. Seedling of *ddm1-9* (C24) x *met1-1* (Col) hybrids at 21 (A) and 34 (B) DAS. (C) Time course of rosette diameter. Data represent mean values  $\pm$  standard error obtained from more than twenty plants.

Table S1 Primer sequences for genotyping of mutants

| Target        | Primer sequences (5'-3') |                           |                      |
|---------------|--------------------------|---------------------------|----------------------|
| <i>ddm1-1</i> | ATTGCTGATGACCAGGTCCT     | CATAAACCAATCTCATGAGGC     | CAPS: <i>Nsi</i> I   |
| <i>ddm1-9</i> | AGATTCAGTGATGAGAAGAGCAGC | GACCCTTCACTGGAAAAGCTTCAGC | Direct sequencing    |
| <i>met1-1</i> | ACTTGGCTCCCTTCTCGA       | CAGCCCCAGGCCTAGTTGGG      | CAPS: <i>Hae</i> III |

Table S2 Primer sequences for expression analysis

| Target         | Primer sequences (5'-3')              |                                  |
|----------------|---------------------------------------|----------------------------------|
| <b>RT-PCR</b>  |                                       |                                  |
| <i>MET1</i>    | TGCCAATGATTATCCTCTCCCATCG             | TGTTTCATCGGTAGAAAGTTCCAGTG       |
| <i>soloLTR</i> | ATCAATTATTATGTCATGTTAAAACCGATTG       | TGTTTCGAGTTTTATTCTCTCTAGTCTTCATT |
| <i>AtSN1</i>   | AACGTGCTGTTGGCCCAAGT                  | CTGGAAGTTCAAGCCCAAAG             |
| <i>GAP</i>     | CACTTGAAGGGTGGTGCCAAG                 | CCTGTTGTCGCCAACGAAGTC            |
| <b>RT-qPCR</b> |                                       |                                  |
| U1             | At1g27730 TTCTCGCTCGCGACAACCGTCAGCC   | CCCGCACCTTCGGAGTTGGACACGC        |
| U2             | At1g54040 AACTGTATCCTGCTTAGGCGTGCGC   | ATTGCACAGCATTAGACTCATAAGTC       |
| U3             | At4g03060 TGAATCATAATAATCTCTCCGAGAG   | ATTATCATTAACACCGGTATCAGCG        |
| U4             | At4g29200 GCTCTTTGGACAGATTTCGTGCTCGG  | TCTCTATCAAATGGTGTCCATGGCC        |
| U5             | At4g16860 AAGCTTCAGTGGGGTAGATGTTCCG   | TTCTGATCCTCTGGTTTGTCTCTCGC       |
| U6             | At1g61500 CTCGATTTATCGTTCATAATCGTG    | ATGACCTTAAGATTTCCGCTAICTG        |
| U7             | At3g14210 ATGACCTTAAGATTTCCGCTAICTG   | GGTATTAACCACTTCCATAATCCG         |
| U8             | At5g56030 AGATCTTCCTCCGTGAACTCATCAG   | AGACTCCCACACGTAAGTCTCATCG        |
| U9             | At2g30790 GAGAAGGATTCAAAAATCCAGATCCC  | CCTAGCTCCTTTGAACCACCTCTTG        |
| U11            | At1g28370 ATGGCACCGA CAGTAAAAC GGCGG  | AGTTGGTTTT GGCTTAGCT CCACG       |
| U12            | At2g26530 ATGGAAGTGA TGAGCTTGAC TGCCC | GTGATCTTCC TAGGCGTGCC TGGAG      |
| U13            | At4g20480 TGATGAGGGT GATGGAGCCT CCGCC | TTAAGGATGT CACGAGGGAC CTCTG      |
| U14            | At5g26030 GCAGGCAACG GCTTATCAT CTGGG  | GTTTCATCAT AAGAACAGTC TCCAG      |
| U15            | At1g31580 TGGCATCTT TATAGTCTT TCCAT   | AACAGAAAGG GCACCTTCTG GGACG      |
| U16            | At5g15360 ATGATCAGTT GGAATTTGA AGTGA  | CAGATGCTGT CCACGAGCAA TCTAG      |
| U17            | At5g48540 TGGCTCTTGT ATGTAGCTGC AGAGC | TGCTGATAAT TCCTCTACAT TGAGC      |
| D1             | At2g43570 CGCTCTCAAACTGTGGCTGCGCC     | CCCTGTTTCTTGGGCTACGTGAGCG        |
| D2             | At3g57260 ACGGGATGCTAGGCGATACCTTGCC   | ACCTTGACTTCAAGCCCTGCTCCAG        |
| D3             | At5g10760 CCATTCAAGTCAGCTCTCTGTTCCC   | TCACTTCCGGTGTGGAAGACCAGCG        |
| D4             | At5g54610 TATTCTTATTCAAGCGGCTCCCG     | CTCGTATTATCGTTCATAATCGTG         |
| D5             | At2g24850 CCTCCGCCATTCCAATTCAGGAC     | TCTCGGGGAGAAGATCGTATTTGCG        |
| D6             | At4g20110 GTCGAAGCACGACGGCTCGATAGCC   | CCAAATGATTATCGATTAACACCG         |
| D7             | At1g02340 CCAAATGATTTATCGATTAACACCG   | ACTTGCTGTGAAAGATCAGGGCATG        |
| D8             | At2g14610 GTCTTTGTAGCTCTTGTAGGTGCTC   | ACTTTGGCACATCCGAGTCTCACTG        |
| D9             | At2g45660 AGAATGCAACAAGCAGACAAGTGAC   | TTGCTCAATCTGTTGCAGCTCCTCG        |
| D10            | At1g45145 ATGGCCGGTG AAGGAGAAGT GATTG | TTTGAATTCC TGAGCAACAG CTGTC      |
| D11            | At3g50770 GGCAACTCAA AAAGAGAAAC CTTC  | GATCTTACCG TCGCCGTCG TGTCG       |

Table S3 Sequences of DNA oligo used for Northern blotting.

| <u>Target</u> | <u>Sequence (5'-3')</u>         |
|---------------|---------------------------------|
| siRNA02       | ATC GGC TGG CGG ACT GGT CAA C   |
| siRNA1003     | ATG CCA AGT TTG GCC TCA CGG TCT |
| miR171        | GAT ATT GGC GCG GCT CAA TCA     |

Table S4 Primer sequences for DNA methylation analysis

| Target                      | Primer sequences (5'-3')  |                           |
|-----------------------------|---------------------------|---------------------------|
| <b>Chop-PCR</b>             |                           |                           |
| <i>AtSN1</i>                | AGGATTTATTTCAATCCACGAACCT | CGACTCCCATAAGTAACGAGTTG   |
| <i>actin</i>                | CTCATGAAGATTCTCACTGAG     | ACAACAGATAGTTCAATTCCCA    |
| <b>Bisulfite sequencing</b> |                           |                           |
| <i>FIS2</i>                 | AYAATAATTAAGGTYYAATYGYATA | AAAAARAATCATRRAAACAACAAR  |
| At3g19630                   | GAGGTTGTGYATGAAGTTTGA     | TCRATCCARTCTCCATATATTC    |
| At5g58410                   | GTTGGTYTTGATATATAGAGGG    | TTCTAACACTTCRRTCATCCTT    |
| <b>MeDIP-qPCR</b>           |                           |                           |
| At1g51172                   | GAATCTGAAGCTCGCAGGTC      | GCGAAGCGAAGGTAGTTGTC      |
| At1g52010                   | ATGGTGAGACCGATGCTTCT      | GAGAGGTTTCGCTCAAGGTG      |
| At1g58561                   | ATCCAACAAAGGCAGAGGTG      | GCAGCTAAGGCAAGTGGAAG      |
| At4g08720                   | TCAAACCGATACCGTCTTCC      | ATTGGACGGACAAGGAACAG      |
| At4g10990                   | AGAAGGTGGCTCAAGTTGGA      | GTTCCATGGCGAAATGAGTT      |
| At5g19165                   | CGAAGCCATTTAAGCATATATCTGG | CGTGAGATAATTGGGAGGTTATTGT |
| <i>EDV</i>                  | TGGCATGCTAGGCTAGGYCATCCTC | GTGTATTCTCCTCCATTRTCGGTCC |
| <i>PORC</i>                 | GGCTTAGCGTCAGGATTGAATGGGC | TTTGCCAGCTTCCTCTTCAGATACG |
| <i>SAHH1</i>                | GCTACTCTTTTGATTCATGAGGGTG | AGGGAACAAAAGAGTTCCATTTTGC |

Table S5 Primer sequences for RNAi construct

| Target      | Primer sequences (5'-3')                  |
|-------------|-------------------------------------------|
| <i>MET1</i> | TCTGAACACCTGCCTCACAG CCCATGGACGACCAAATATC |
